# Supplementary material
Source: Springer Nature journal article supplement (https://www.springermedizin.de/resource/supplementary/12955_2010_761_MOESM3_ESM.pdf/9560936)
Supplement: MOESM3 [file 9560936]

In total 224 items\* were linked to 365 content concepts

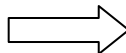

82 not linked to the ICF/ICF-CY (44 *nc* and 38 *nd*)

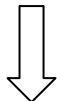

283 linked to the ICF/ICF-CY sub-divided in:

95 Body Functions

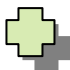

5 Body structures

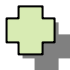

101 Activity and participation

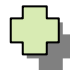

82 Environmental Factors

*\*For the Haemo-QoL questionnaire which exists of three age-group versions, only the version for adolescents was used since the other two versions represent a shorter version of the adolescent's questionnaire.*
